# Supplementary material
Source: PubMed Central journal article supplement (PMC7362336)
Supplement: NIHMS1602075-supplement-Mao_NM_Supplemental.pdf [file NIHMS1602075-supplement-Mao_NM_Supplemental.pdf]

**Parenchymal and Stromal Tissue Regeneration of Tooth Organ by Pivotal Signals**

**Reinstated in Decellularized Matrix**

Ling He<sup>1,2+</sup>, Jian Zhou<sup>3,1+</sup>, Mo Chen<sup>1</sup>, Chyuan-Sheng Lin<sup>10</sup>, Sahng G. Kim<sup>1,4</sup>, Yue Zhou<sup>1,13</sup>, Lusai Xiang<sup>1,2</sup>, Ming Xie<sup>1,15</sup>, Hanying Bai<sup>1</sup>, Hai Yao<sup>5</sup>, Changcheng Shi<sup>5</sup>, Paulo G. Coelho<sup>6</sup>, Timothy G. Bromage<sup>6</sup>, Bin Hu<sup>6</sup>, Nick Tovar<sup>6</sup>, Lukasz Witek<sup>6</sup>, Jiaqian Wu<sup>8</sup>, Kenian Chen<sup>8</sup>, Wei Gu<sup>10</sup>, Jinxuan Zheng<sup>1,2</sup>, Tzong-Jen Sheu<sup>7</sup>, Juan Zhong<sup>1</sup>, Jin Wen<sup>1,15</sup>, Yuting Niu<sup>1</sup>, Bin Cheng<sup>9</sup>, Qimei Gong<sup>1,2</sup>, David M. Owens<sup>10,11</sup>, Milda Stanislauskas<sup>11</sup>, Jasmine Pei<sup>1</sup>, Gregory Chotkowski<sup>16</sup>, Sainan Wang<sup>1</sup>, Guodong Yang<sup>1</sup>, David J. Zegarelli<sup>4</sup>, Xin Shi<sup>1</sup>, Myron Finkel<sup>17</sup>, Wen Zhang<sup>1,2</sup>, Junyuan Li<sup>1</sup>, Jiayi Cheng<sup>1</sup>, Dennis P. Tarnow<sup>4</sup>, Xuedong Zhou<sup>12</sup>, Zuolin Wang<sup>13</sup>, Xinquan Jiang<sup>15</sup>, Alexander Romanov<sup>14</sup>, David W. Rowe<sup>18</sup>, Songlin Wang<sup>3</sup>, Ling Ye<sup>12</sup>, Junqi Ling<sup>2\*</sup>, Jeremy J. Mao<sup>1,4,10,19,20\*</sup>

<sup>1</sup>Columbia University, Center for Craniofacial Regeneration, 630 W. 168 St. New York, NY, 10032, USA

<sup>2</sup>Operative Dentistry and Endodontics, Guanghua School of Stomatology, Affiliated Stomatology Hospital, Guangdong Provincial Key Laboratory of Stomatology, Sun Yat-sen University, Guangzhou, Guangdong, 510055, China.

<sup>3</sup>Molecular Laboratory for Gene Therapy and Tooth Regeneration, Beijing Key Laboratory of Tooth Regeneration and Function Reconstruction, Capital Medical University School of Stomatology, Beijing 100050, China

<sup>4</sup>Columbia University College of Dental Medicine, 630 W. 168 St. – PH7E, New York, NY 10032 USA

<sup>5</sup>Department of Bioengineering, Clemson University, Charleston, SC 29425, USA

<sup>6</sup>Department of Biomaterials and Biomimetics, New York University, New York, NY 10010

<sup>7</sup>University of Rochester Medical Center, School of Medicine and Dentistry, Rochester, NY 14642

<sup>8</sup>Vivian L. Smith Department of Neurosurgery, Center for Stem Cell and Regenerative Medicine University of Texas McGovern Medical School at Houston, Houston, TX 77030

<sup>9</sup>Columbia University Mailman School of Public Health, Department of Biostatistics, New York, NY 10032

<sup>10</sup>Department of Pathology and Cell Biology, Columbia University, 630 West 168th Street, New York, NY 10032

<sup>11</sup>Department of Dermatology, Columbia University, 1150 St. Nicholas Avenue, New York, NY 10032

<sup>12</sup>State Key Laboratory of Oral Diseases, West China Hospital of Stomatology, West China School of Stomatology, Sichuan University, Chengdu, China 6100

<sup>13</sup>Department of Conservative Dentistry, Laboratory of Biomedical Science and Translational Medicine, School of Stomatology, Tongji University, Shanghai, China 200072

<sup>14</sup>Institute of Comparative Medicine, Columbia University Medical Center, 630 W. 168 Street, New York, NY 10032 USA

<sup>15</sup>Department of Prosthodontics, Shanghai Jiao Tong University, Shanghai, China 200072

<sup>16</sup>Private Practice, 563 Park Ave, New York, NY 10065

<sup>17</sup>Private Practice, 434 E 57th Street, New York, NY, 10022

<sup>18</sup>Center for Regenerative Medicine and Skeletal Development, University of Connecticut Health Science Center, 263 Farmington Avenue, Farmington, CT 06030-3705

<sup>19</sup>Department of Orthopedic Surgery, Columbia University Physician and Surgeons, 630 W. 168 St. PH10-102, New York, NY 10032, USA

<sup>20</sup>Department of Biomedical Engineering, Columbia University, 1210 Amsterdam Ave, New York, NY 10027

**+: Co-first authors**

**Correspondence and requests for materials should be addressed to**

Jeremy J. Mao

Edwin S. Robinson Professor

Columbia University

630 W. 168 St. – PH7E

New York, NY 10032

Phone: 212-305-4475

Email: [jmaojournals@yahoo.com](mailto:jmaojournals@yahoo.com)

Junqi Ling

Professor

Department of Operative Dentistry and Endodontics, Guanghua School of Stomatology, Hospital of Stomatology, Sun Yat-sen University, Guangzhou, Guangdong, 510055, China

Email: [lingjunqi@163.com](mailto:lingjunqi@163.com)

Contents:

1. Supplementary notes.
2. Supplementary figures and figure legends.
3. Supplementary tables.

## Supplementary notes

### CRISPR/Cas9 - Alx3 KO

#### Design:

- Homeobox domain resides between aa125 and aa210.
- Locate the exon harboring this homeobox domain.
- Design two guides that may cut in front of this HB domain.
- Design two guides that may cut after this HB domain.
- Generate the sgRNAs and inject these sgRNAs + nlsCas9 (RNP) into B6CBAF1 eggs to generate mice with the HB domain deletion.

## Homeobox protein aristaless-like 3 (070137)

Export FASTA

**Accession** [O70137](#) (ALX3\_MOUSE)

**Species** Mus musculus (Mouse)

**Length** 343 amino acids (complete)

Source: UniProtKB

## Protein family membership

[IPR033211](#) Homeobox protein aristaless-like 3 (IPR033211)

## Homologous superfamilies

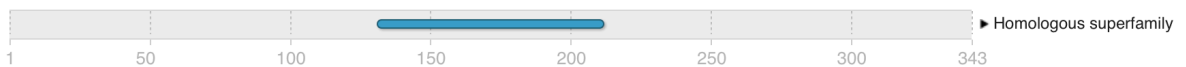

## Domains and repeats

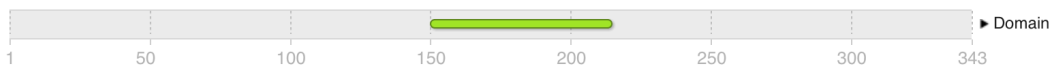

## Detailed signature matches

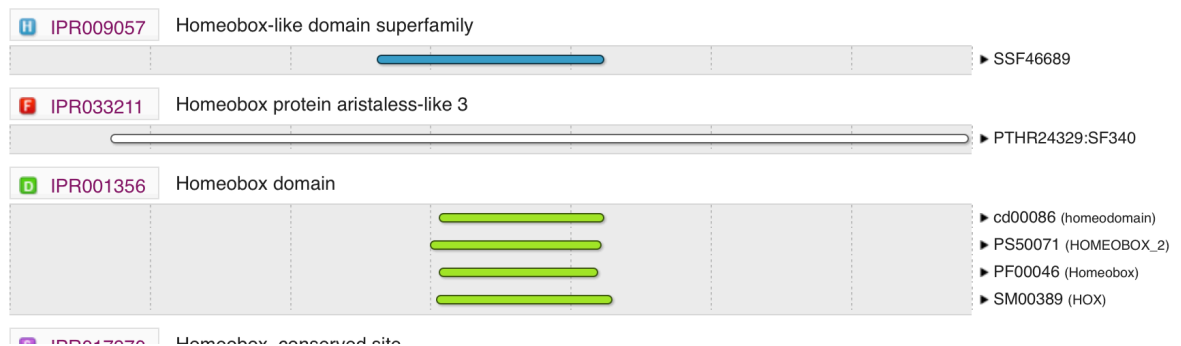

Alx3-5-203R: **catttcggggaagtgctctg**  
TTCTAATACGACTCACTATAG**G**catttcggggaagtgctctgGTTTTAGAGCTAGA

Alx3-5-34F: **tagcagaggcatgagcctga**  
TTCTAATACGACTCACTATAG**G**tagcagaggcatgagcctgaGTTTTAGAGCTAGA

Alx3-3-49R: **acagatattggactccaag**

TTCTAATACGACTCACTATAGGacagatattggactccaagGTTTTAGAGCTAGA

Alx3-3-121R: ggcaacagaaatccattgag

TTCTAATACGACTCACTATAGggcaacagaaatccattgagGTTTTAGAGCTAGA

0.05 umole PAGE oligos were ordered from Sigma on 2/23/2018 (\$169.06)

- performed CRISPR EZ with combinational guides in B6CBAF1 eggs.
- eggs recovered in aKSOM and electroporation in aKSOM X 4 PULSES.

Assay the editing (deletion) by Alx3delat1F/1R PCR

**(1) 1649bp-836bp deletion=813bp amplicon (didn't test this set)**

|                               |       |     |
|-------------------------------|-------|-----|
| sgRNA-Alx3-5-203R (1368ng/ul) | 2.9ul |     |
| sgRNA-Alx3-3-49R (1848ng/ul)  | 2.2ul |     |
| 1N NaCl                       |       | 2ul |
| 40uM Cas9(QB3, Berkeley)      |       | 5ul |

**(2) 1649bp-908bp deletion=741bp amplicon**

|                               |       |     |
|-------------------------------|-------|-----|
| sgRNA-Alx3-5-203R (1368ng/ul) | 2.9ul |     |
| sgRNA-Alx3-3-121R (2344ng/ul) | 1.7ul |     |
| 1N NaCl                       |       | 2ul |
| 40uM Cas9(QB3, Berkeley)      |       | 5ul |

**(3) 1649bp-1006bp deletion=643bp amplicon**

|                              |       |       |
|------------------------------|-------|-------|
| sgRNA-Alx3-5-34F (820ng/ul)  |       | 4.9ul |
| sgRNA-Alx3-3-49R (1848ng/ul) | 2.2ul |       |
| 1N NaCl                      |       | 2ul   |
| 40uM Cas9(QB3, Berkeley)     |       | 5ul   |

**(4) 1649-1078bp deletion=571bp amplicon**

|                               |       |       |
|-------------------------------|-------|-------|
| sgRNA-Alx3-5-34F (820ng/ul)   |       | 4.9ul |
| sgRNA-Alx3-3-121R (2344ng/ul) | 1.7ul |       |
| 1N NaCl                       |       | 2ul   |
| 40uM Cas9(QB3, Berkeley)      |       | 5ul   |

- mix 14ul RNP with 10ul aKSOM/30 embryos.
- 4 pulses, 8% droop.
- culture t blastocyst stage for genotyping
- over 90% of the embryos became blastocysts when checked at 4pm Sunday.
- lyse blastocysts in 10ul lysis buffer.
- perform 34 cycle PCR with Alx3Delta1F/1R.
- make 10-fold dilution of 1st PCR and use 2ul for 2nd PCR with 3F/3R primers.

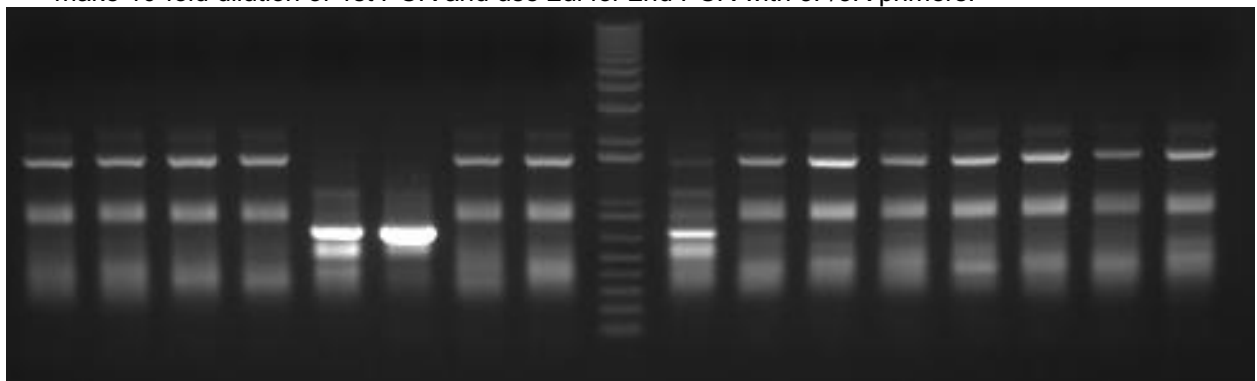

1 2 3 4 5 6 7 8 1kb+ 9 10 11 12 13 14 15 16

### 1649bp-908bp deletion=741bp amplicon

#5, #6, and #9 have the edited allele. The 1.6kb amplicon is the WT and the 0.8kb amplicon is non-specific and appears in all samples. Don't say #5 and #6 are homozygotes as edited allele will compete with the WT allele in this PCR. The result just confirms that we can generate this deletion in blastocysts with CRISPR technique. Mice with the same deletion should come once we transfer the embryos into the foster moms.

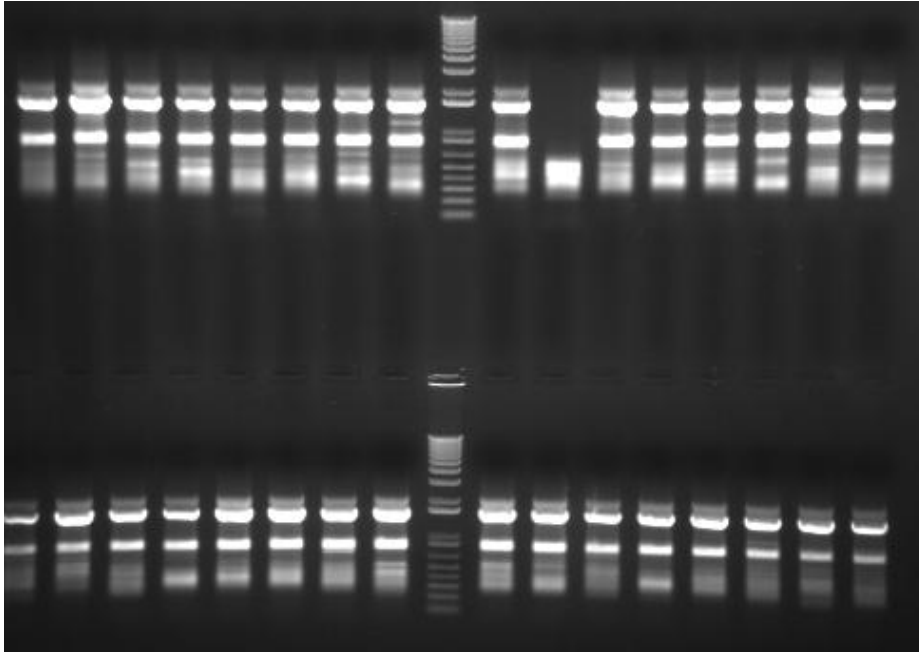

upper:(3) 1649bp-1006bp deletion=643bp amplicon  
lower:(4) 1649-1078bp deletion=571bp amplicon

- genotyping 11 pups with Alx3delta 3F/3R. Amplicon is 741bp.

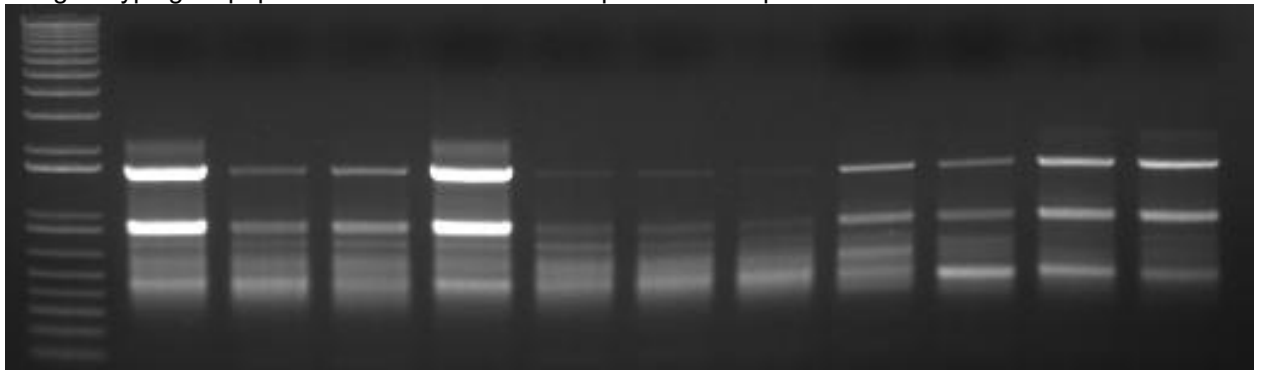

- genotype 16+16 pus

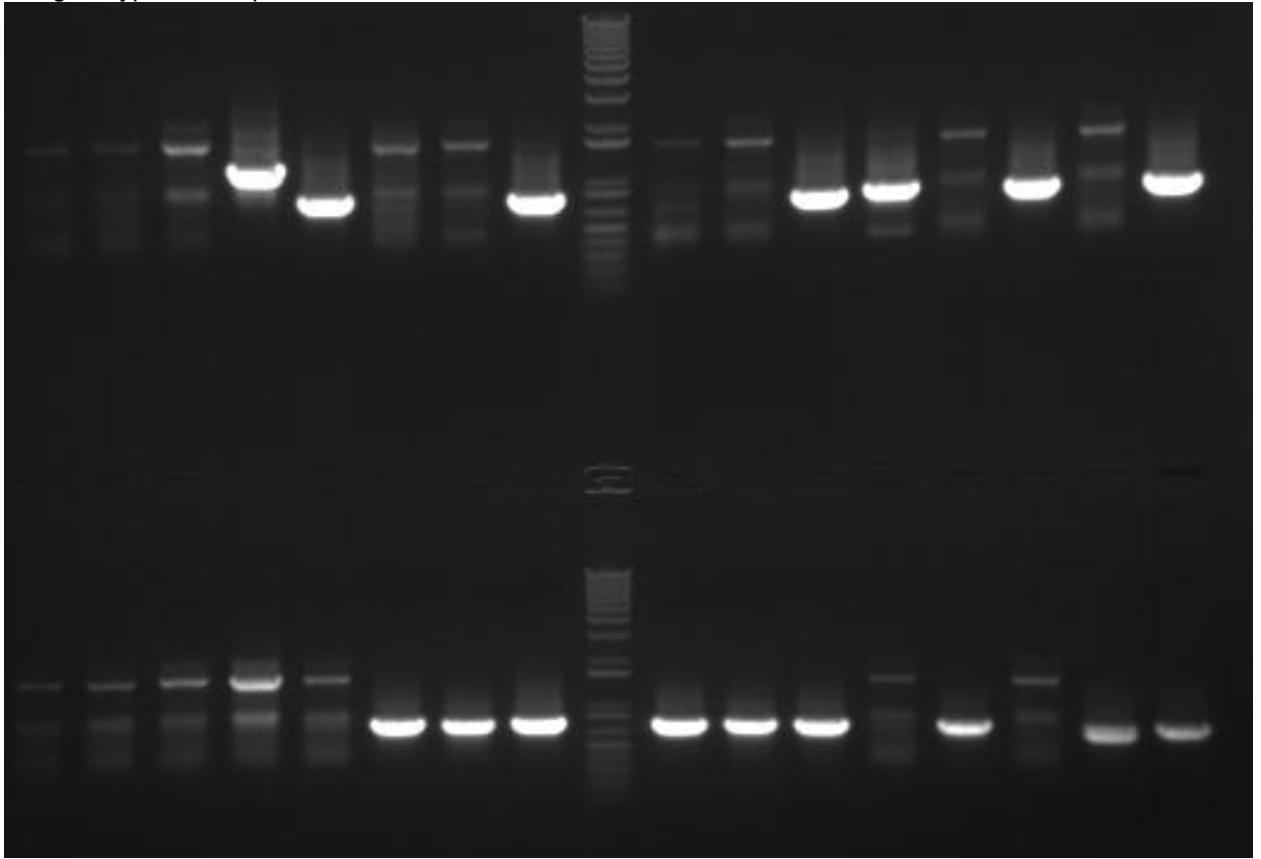

- 15 out of 32 have Alx3 deletion.
- A nested PCR was used for this genotyping. PCR-A was performed according to the following parameters and the PCR product was diluted 10 times before running the 2nd PCR-B.
- DNA ladder used in this gel is Invitrogen's 1kb plus DNA ladder.

PCR-A

|        |                              | <u>PCR Reaction (20ul)</u> |       |
|--------|------------------------------|----------------------------|-------|
|        |                              |                            | X10   |
| 2ul    | Tail lysate                  |                            |       |
| 15.3ul | water                        |                            | 153ul |
| 2ul    | 10X NEB ThermoPol PCR buffer |                            | 20ul  |
| 0.4ul  | 10 mM dNTP                   |                            | 4ul   |
| 0.05ul | Forward primer (100 pmol/ul) |                            | 0.5ul |
| 0.05ul | Reverse primer (100 pmol/ul) |                            | 0.5ul |
| 0.2ul  | Taq (5 units/ul)             |                            | 2ul   |
| -----  |                              |                            |       |
| 20ul   | total                        |                            |       |

PCR parameters

|                         |      |     |
|-------------------------|------|-----|
| 94°                     | 60s  | X1  |
| 94°                     | 10s  | X34 |
| 60°                     | 10s  |     |
| 72°                     | 30s  |     |
| 72°                     | 2m   | X1  |
| 4°                      | HOLD | X1  |
| PCR product:<br>WT:1649 |      |     |

Alx3delta 1F: **acagcactgagggtaatgaggaag**  
 Alx3delta 1R: **acacaaagtggtagccttaggcaaa**

PCR-B

PCR Reaction (20ul)

|        |                               |       |
|--------|-------------------------------|-------|
|        |                               | X10   |
| 2ul    | 10-fold dilution of the PCR-A |       |
| 15.3ul | water                         | 153ul |
| 2ul    | 10X NEB ThermoPol PCR buffer  | 20ul  |
| 0.4ul  | 10 mM dNTP                    | 4ul   |
| 0.05ul | Forward primer (100 pmol/ul)  | 0.5ul |
| 0.05ul | Reverse primer (100 pmol/ul)  | 0.5ul |
| 0.2ul  | Taq (5 units/ul)              | 2ul   |

-----  
 20ul total

0.5kb PCR parameters

|                                           |      |     |
|-------------------------------------------|------|-----|
| 94°                                       | 60s  | X1  |
| 94°                                       | 10s  | X34 |
| 60°                                       | 10s  |     |
| 72°                                       | 30s  |     |
| 72°                                       | 2m   | X1  |
| 4°                                        | HOLD | X1  |
| PCR product:<br>WT:1616bp<br>Delta: 741bp |      |     |

Alx3delta 3F: **acagcactgagggtaatgaggaag**  
 Alx3delta 3R: **gggttttctctgtcagaaggact**

## Supplementary figures and figure legends

### Supplementary Figure 1

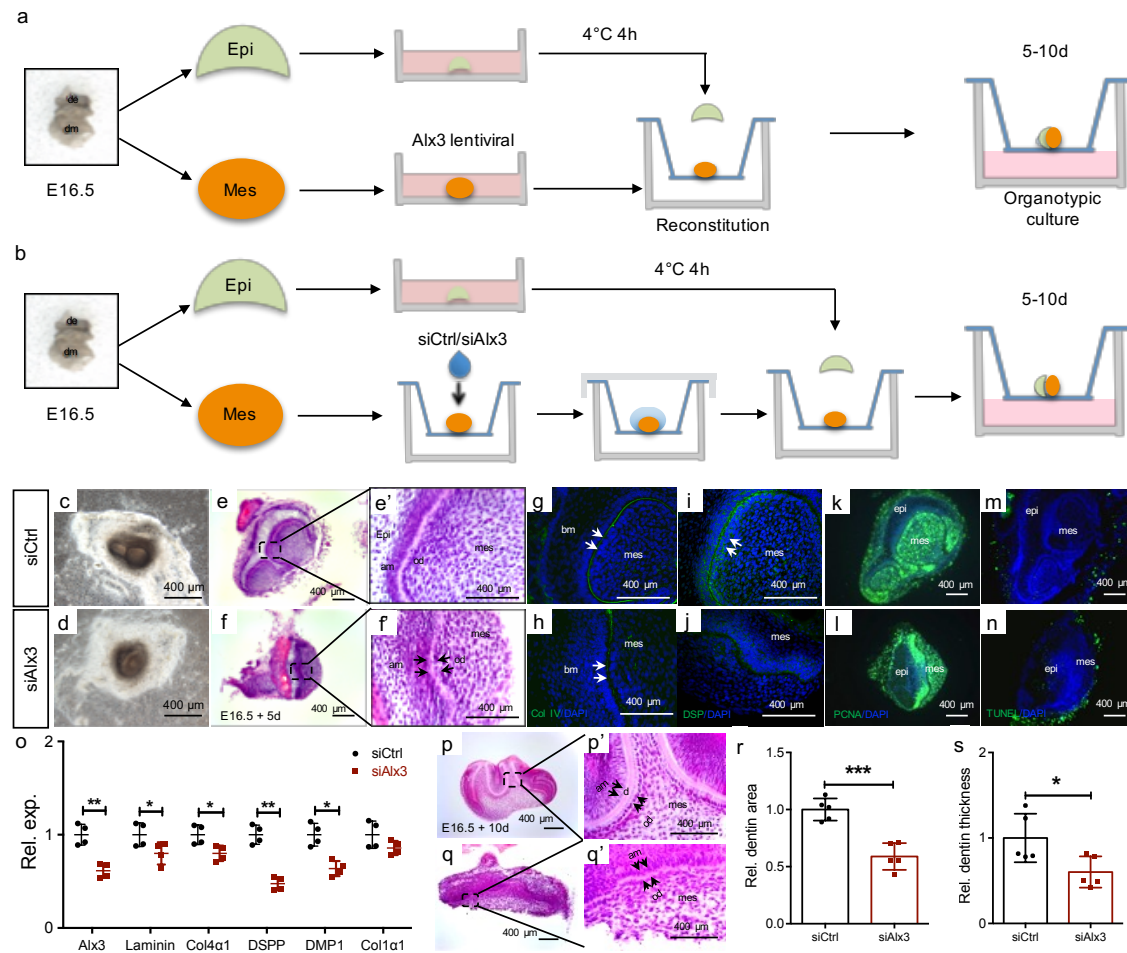

### Supplementary Figure 1

Epithelium and mesenchyme reconstitution and Alx3 manipulation. **a**: Epithelium (Epi) and mesenchyme (Mes) tissues were microdissected. Mes was upregulated with Alx3 lentiviral constructs, whereas Epi was immersed in organ culture medium. The isolated Epi and Mes were reconstituted and cultured for 5 to 10 days. **b**: Epi and Mes isolation and reconstitution as in **a**, except for Alx3 knockdown by siRNA in Mes. **c-f**: Reconstituted E16.5 tooth organs with Alx3 knockdown followed by 5-day culture. Scale bar, 400  $\mu$ m.



**g,h:** Collagen IV immunofluorescence; basement membrane (bm) formation (white arrows). **i,j:** Dentin sialoprotein (DSP) immunofluorescence (white arrows). **k,l:** Proliferating cell nuclear antigen (PCNA) immunofluorescence. **m,n:** TUNEL staining. Scale bar, 400  $\mu\text{m}$ . **c-n:** n=4 biological independent samples. **o:** Real-time PCR of Alx3, laminin, collagen4 $\alpha$ 1, DSPP (dentin sialophosphoprotein), DMP1 (dentin matrix protein-1) and Col1 $\alpha$ 1 upon Alx3 knockdown by 5-day culture. (n=4 biological independent samples. Presented with mean  $\pm$  SD; *P* values calculated by multiple two-sided Student's t-test. \*:  $p < 0.05$ ; \*\*:  $p < 0.01$ ). **p-q':** HE images of E16.5 reconstituted tooth organs following 10-day culture. Black arrows: ameloblasts (am) and odontoblasts (od); d: dentin. Scale bar, 400  $\mu\text{m}$ . **p-q'**: n=5 biological independent samples. **r,s:** Quantified dentin area and thickness. (n=5 biological independent samples. Presented with mean  $\pm$  SD; *P* values calculated by two-sided Student's t-test. \*:  $p < 0.05$ ; \*\*\*:  $p < 0.001$ ).

## Supplementary Figure 2

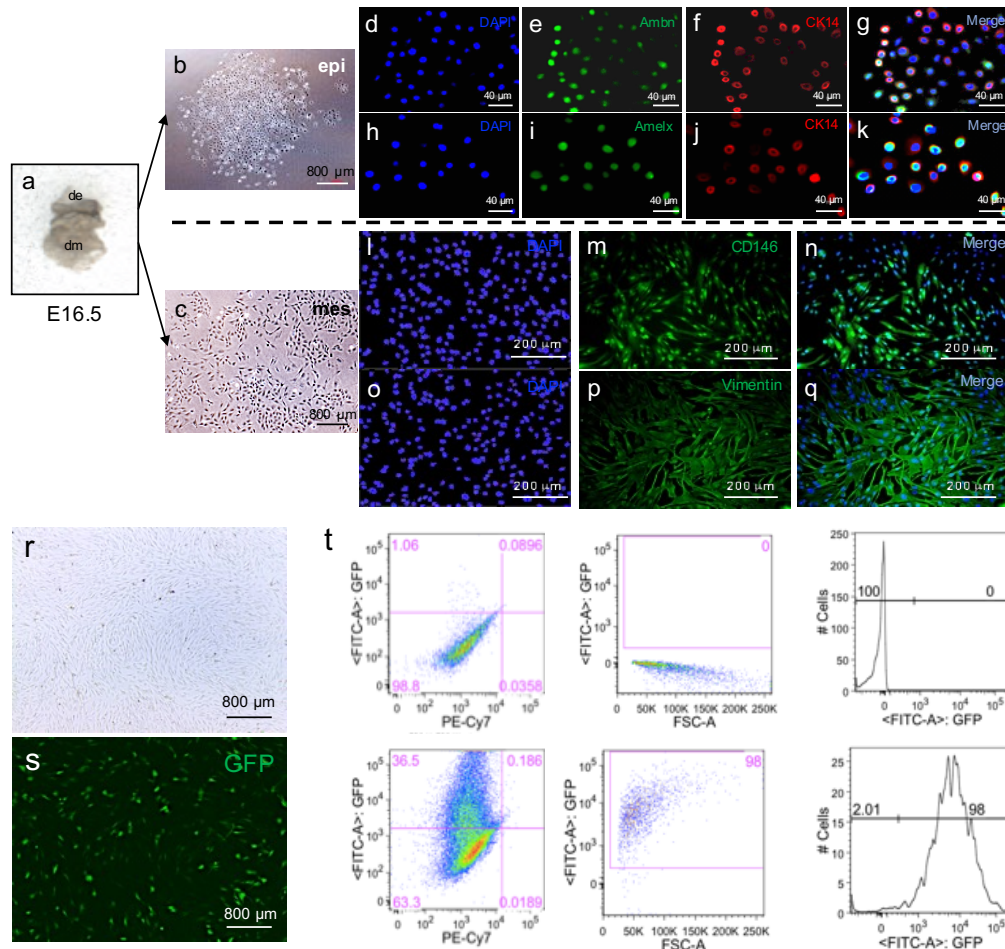

## Supplementary Figure 2

Cell isolation, characterization and *Alx3* overexpression. **a**: E16.5 tooth organ. **b,c**: E16.5 dental epithelium cells (Epi) and mesenchyme cells (Mes) isolated and plated. Scale bar, 800  $\mu$ m. **d-k**: Co-expression of ameloblastin (Ambn), amelogenin (Amelx) and cytokeratin 14 (CK14) by isolated Epi cells. Scale bar, 40  $\mu$ m. **l-q**: CD146 and vimentin expression by isolated Mes cells. Scale bar, 200  $\mu$ m. **a-q**: n=5 biological independent samples. **r,s**: Phase contrast and immunofluorescence image of lentiviral transfected adult,

human dental-pulp mesenchyme stem/progenitor cells and lentiviral Alx3-GFP transfection. Scale bar, 800  $\mu\text{m}$ . **t**: FACS sorted Alx3-GFP cells following three passages showing 98% Alx3-GFP positivity. **r-t**: n=3 biological independent samples.

### Supplementary Figure 3

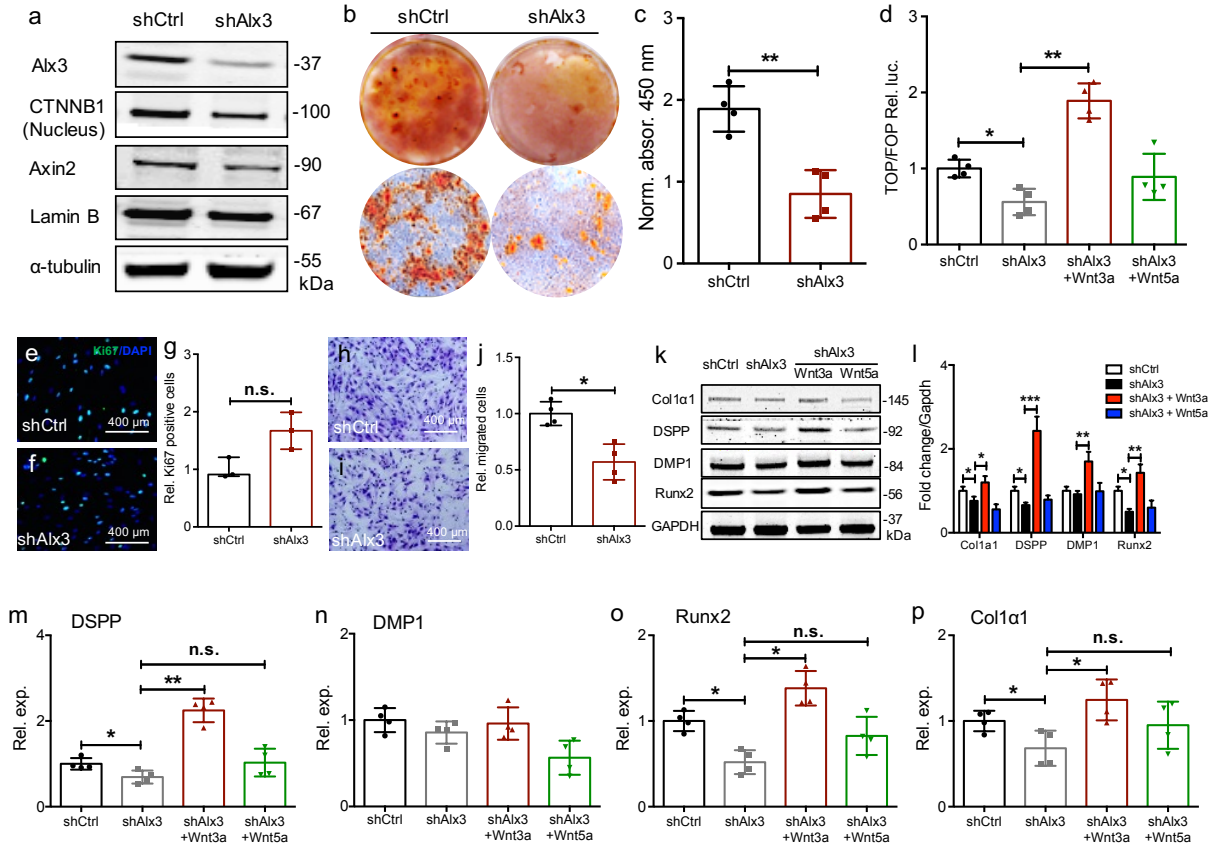

### Supplementary Figure 3

Attenuated cell migration and differentiation upon Alx3 knockdown. **a**: Alx3 knockdown by shRNA (short-hairpin RNA) with nuclear CTNNB1 and Axin2 expression.  $n=3$  biological independent samples. **b,c**: Alizarin Red-S staining and quantification ( $n=4$  biological independent samples. Presented with mean  $\pm$  SD;  $P$  value calculated by two-sided Student's  $t$ -test. \*\*:  $p < 0.01$ ). **d**: Top/Fop Flash of Wnt activity following Alx3 knockdown by shRNA with or without exogenous Wnt3a (100 ng/ml) ( $n=4$  biological independent samples. Presented with mean  $\pm$  SD;  $P$  values calculated by one-way ANOVA with Bonferroni. \*:  $p < 0.05$ ; \*\*:  $p < 0.01$ ).

**e-g:** Ki67 immunofluorescence and quantification indicative of cell proliferation. (n=3 biological independent samples. Presented by median with range; *P* value calculated by Mann-Whitney test. n.s.: not significant). Scale bar, 400  $\mu$ m. **h-j:** Transwell migration assay of Alx3 knockdown and shRNA controls, with relative migrated cell number quantification (n=4 biological independent samples. Presented with mean  $\pm$  SD; *P* value calculated by two-sided Student's t-test. \*:  $p<0.05$ ). Scale bar, 400  $\mu$ m. **k,l:** Western blot of collagen1 $\alpha$ 1, DSPP, DMP1 and Runx2 of shAlx3 cells with Wnt3a (100 ng/ml) or Wnt5a (200 ng/ml) supplement and quantification (n=4 biological independent samples. Presented with mean  $\pm$  SD; *P* values calculated by one-way ANOVA with Bonferroni. \*:  $p<0.05$ ; \*\*:  $p<0.01$ ; \*\*\*:  $p<0.001$ ). **m-p:** Real-time PCR of DSPP, DMP1, Runx2 and Col1 $\alpha$ 1 of shRNA control and shAlx3 cells with Wnt3a (100 ng/ml) or Wnt5a (200 ng/ml) supplement (n=4 biological independent samples. Presented with mean  $\pm$  SD; *P* values calculated by one-way ANOVA with Bonferroni. \*:  $p<0.05$ ; \*\*:  $p<0.01$ ; n.s.: not significant).

## Supplementary Figure 4

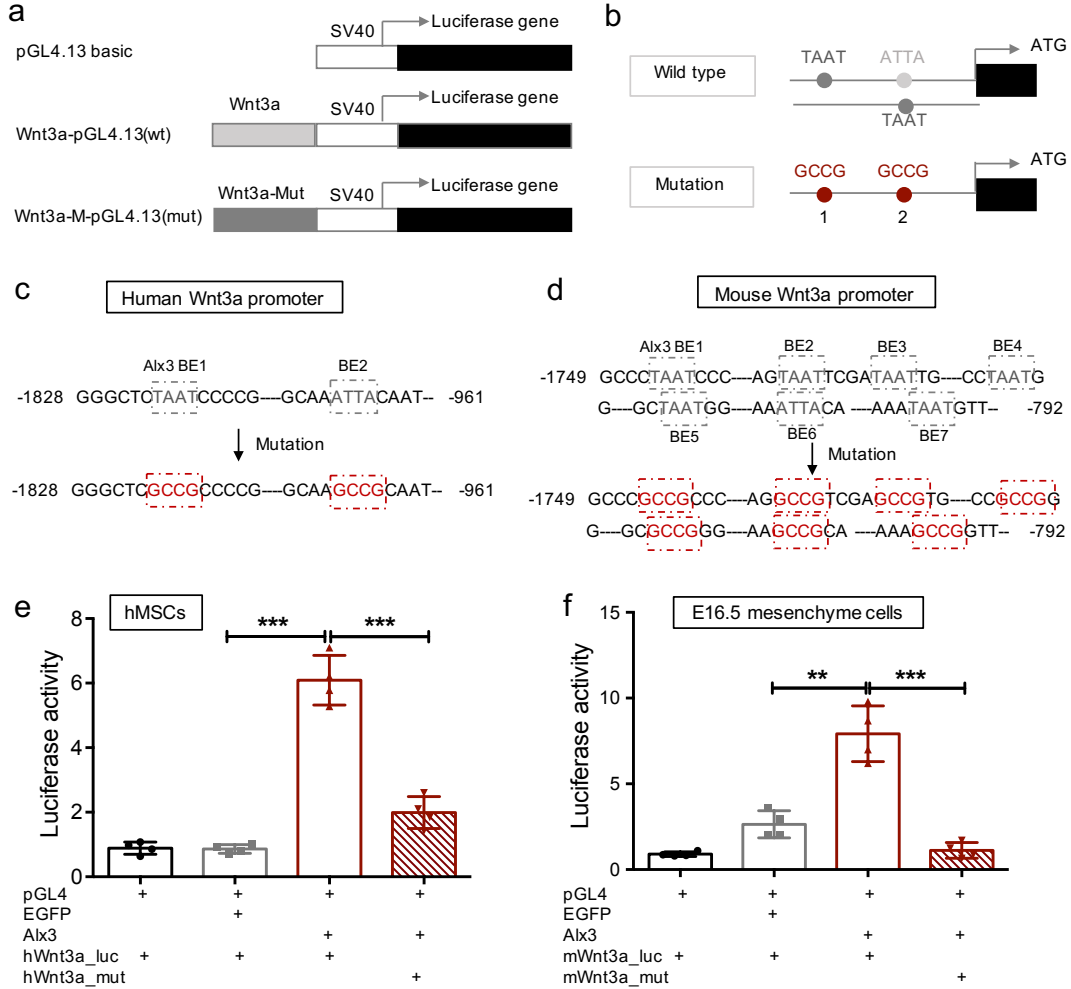

## Supplementary Figure 4

Alx3 transactivates Wnt3a expression at transcriptional level. **a,b**: Wnt3a promoter luciferase reporter constructs. wt: wild type; mut: mutation. Mutation from Alx3 binding element TAAT or reverse chain ATTA to GCCG in Wnt3a promoter reporters. **c**: Human Wnt3a promoter reporter with two Alx3-binding elements (BE). **d**: Mouse Wnt3a promoter reporter with seven Alx3-binding elements. **e,f**: Wnt3a luciferase assay upon Alx3 transfection in both human dental-pulp mesenchyme stem/progenitor cells (**e**) and mouse E16.5

mesenchyme cells (f). (n=4 biological independent samples. Presented with mean  $\pm$  SD; *P* values calculated by one-way ANOVA with Bonferroni. \*\*:  $p < 0.01$ ; \*\*\*:  $p < 0.001$ ).

## Supplementary Figure 5

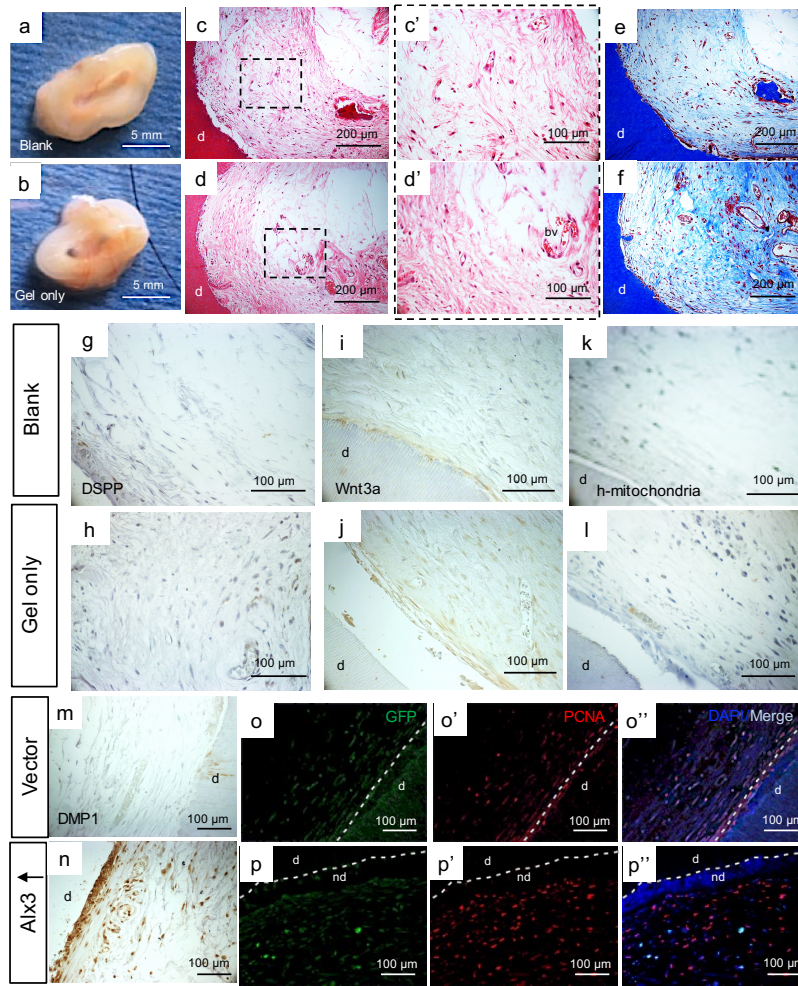

### Supplementary Figure 5

Retrieved *in vivo* 8-wk implantation samples. **a,b**: Retrieved decellularized scaffolds only (Blank) and decellularized scaffolds with collagen gel (Gel only). Scale bar, 5 mm. **c-d'**: HE staining. **c,d**: scale bar, 200  $\mu\text{m}$ ; **c',d'**: scale bar, 100  $\mu\text{m}$ . **e,f**: Masson's Trichrome staining. Scale bar, 200  $\mu\text{m}$ . **a-f**: n=5 biological independent samples. **g,h**: DSPP (dentin sialophosphoprotein) immunohistochemistry of Blank and Gel only controls. **i,j**: Wnt3a immunohistochemistry of Blank and Gel only controls. **k-l**: Human mitochondria immunohistochemistry of Blank and Gel only controls. **m,n**: DMP1 (dentin matrix protein 1)



immunohistochemistry of vector control (**m**) and Alx3 overexpression (**n**) samples. **o-p**": Proliferating cell nuclear antigen (PCNA) immunofluorescence of vector control (**o-o**") and Alx3 overexpression (**p-p**") samples. **g-p**": n=3 biological independent samples. d: dentin; bv: blood vessel; nd: newly-formed dentin. White dash lines: boundary between native dentin and newly-formed dentin. Scale bar, 100  $\mu$ m.

## Supplementary Figure 6

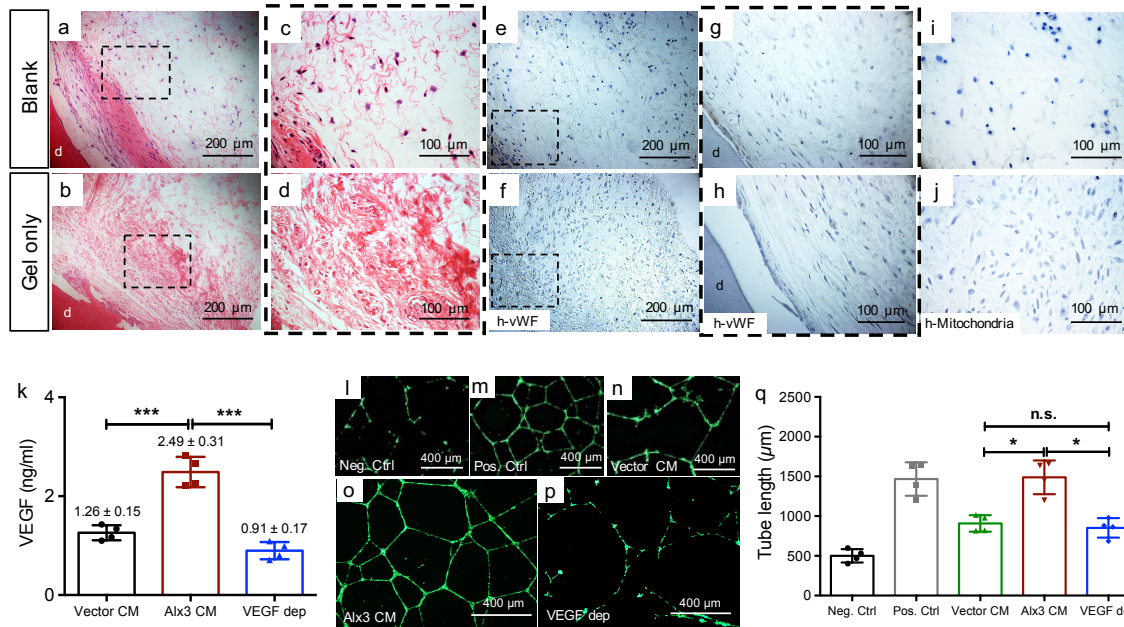

## Supplementary Figure 6

Retrieved *in vivo* 4-wk implantation samples and HUVEC angiogenesis assays. **a-d**: HE staining of decellularized scaffolds only (Blank) and decellularized scaffolds with collagen gel (Gel only). **d**: dentin. **a,b**: scale bar, 200  $\mu\text{m}$ ; **c,d**: scale bar, 100  $\mu\text{m}$ . **e-h**: human von Willebrand factor (h-vWF) immunohistochemistry. **e,f**: scale bar, 200  $\mu\text{m}$ ; **g,h**: scale bar, 100  $\mu\text{m}$ . **i,j**: human mitochondria immunohistochemistry. Scale bar, 100  $\mu\text{m}$ . **a-j**:  $n=5$  biological independent samples. **k**: ELISA of VEGF content in vector conditioned medium (CM), or Alx3 CM with or without VEGF depletion (VEGF dep). ( $n=4$  biological independent samples. Presented with mean  $\pm$  SD;  $P$  values calculated by one-way ANOVA with Bonferroni. \*\*\*:  $p < 0.001$ ). **l-p**: Tube formation (calcein staining) by HUVECs treated by vector CMs, Alx3 CM and VEGF depletion.  $n=4$  biological independent samples. Scale bar, 400  $\mu\text{m}$ . **q**: Tube length quantification ( $n=4$  biological independent samples. Presented with mean  $\pm$  SD;  $P$  values calculated by one-way ANOVA with Bonferroni. \*:  $p < 0.05$ ; n.s.: not significant).

## Supplementary Figure 7

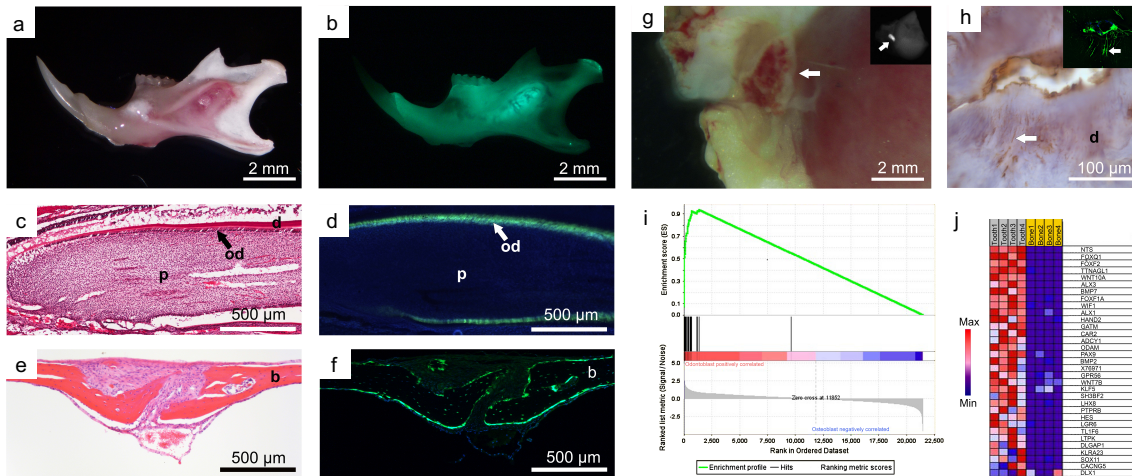

## Supplementary Figure 7

Identification of pivotal molecules in dentin development. **a:** Mandible of a transgenic 2.3 kb collagen type  $\alpha 1$  chain (col1 $\alpha 1$ )-EGFP mouse. **b:** GFP expressed in mandibular teeth and bone. Scale bar, 2 mm. **c:** Dental pulp (p) of the mandibular incisor with odontoblasts (od) aligned immediately adjacent to mineralized dentin (d). **d:** GFP expressed in odontoblasts (od) but not the rest of dental pulp (p) cells. **e:** Calvarial bone (b) with marrow and cranial suture. **f:** GFP expressed in osteoblasts and osteocytes of the calvarial bone (b). Scale bar, 500  $\mu$ m. **g:** GFP+ odontoblasts infused ectopically into the subrenal capsule of athymic mice in a collagen gel carrier (arrow). A radiographically visible mineral nodule formed in 6 wks (arrow in insert). Scale bar, 2 mm. **h:** Mineral nodule formed by infused GFP+ odontoblasts with GFP+ processes (arrow in insert) extending into DSPP (d) positive structures (arrow). Scale bar, 100  $\mu$ m. **i,j:** Donor-matched odontoblasts and osteoblasts profiled by genome microarray followed by GSEA and pathway analyses. (n=4 biological independent samples. *P* values calculated by one-way ANOVA with Bonferroni).

## Supplementary Figure 8

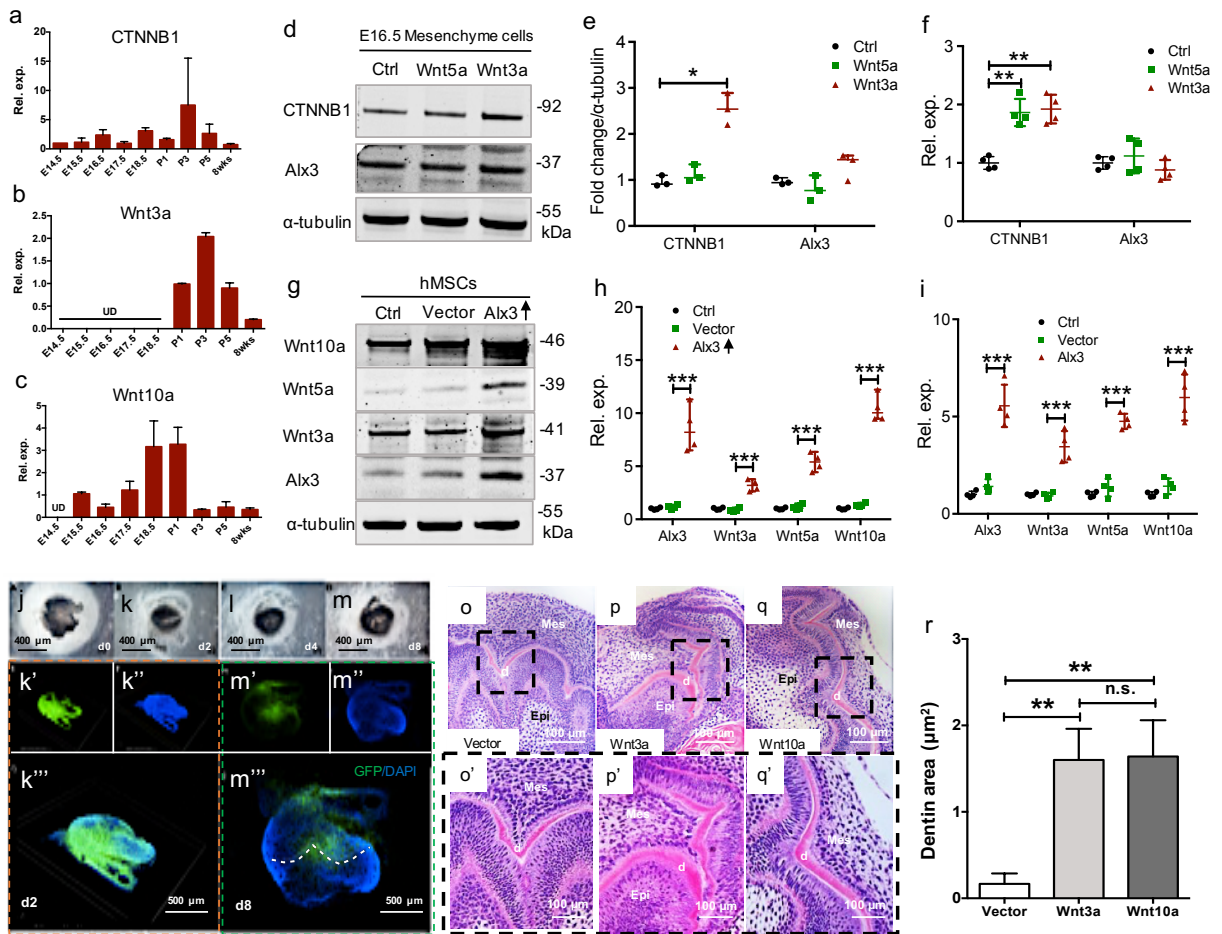

## Supplementary Figure 8

Wnt ligand expression patterns in tooth development and upon Alx3 transfection in reconstituted E16.5 tooth organ. **a-c**: Real-time PCR of CTNNB1, Wnt3a and Wnt10a from E14.5 to postnatal 8 wks. UD: undetectable. n=4 biological independent samples. **d**: Western blot of CTNNB1 and Alx3 upon exogenous Wnt5a (200 ng/ml) or Wnt3a (100 ng/ml) treatment in isolated E16.5 mesenchyme cells, and quantification in **e**. (n=3 biological independent samples. Presented by median with range; *P* values calculated by Kruskal-Wallis test. \*: *p*<0.05). **f**: Real-time PCR of CTNNB1 and Alx3 upon exogenous Wnt5a (200 ng/ml) or

Wnt3a (100 ng/ml) treatment in isolated E16.5 mesenchyme cells (n=4 biological independent samples. Presented with mean  $\pm$  SD; *P* values calculated by one-way ANOVA with Bonferroni. \*\*:  $p < 0.01$ ). **g**: Western blot of Wnt10a, Wnt5a, Wnt3a and Alx3 upon Alx3 overexpression in adult human dental-pulp mesenchyme stem/progenitor cells and quantification (**h**) (n=4 biological independent samples. Presented with mean  $\pm$  SD; *P* values calculated by one-way ANOVA with Bonferroni. \*\*\*:  $p < 0.001$ ). **i**: Real-time PCR of Wnt5a, Wnt3a and Alx3 upon Alx3 overexpression (n=4 biological independent samples. Presented with mean  $\pm$  SD; *P* values calculated by one-way ANOVA with Bonferroni. \*\*\*:  $p < 0.001$ ). **j-m**: Reconstituted tooth organ from day 0 to day 8. Scale bar, 400  $\mu$ m. **k'-m'**: Confocal images of GFP-lentiviral transfected dental mesenchyme reconstituted with dental epithelium in organotypic culture. White dash line: boundary between epithelium and mesenchyme. Scale bar, 500  $\mu$ m. **o-q'**: Basement membrane and dentin formation in vector control, Wnt3a- and Wnt10a-overexpressed samples following 8-day organotypic culture. **j-q'**: n=5 biological independent samples. Epi: epithelium; Mes: mesenchyme; d: dentin. Scale bar, 100  $\mu$ m. **r**: Quantified dentin area (n=5 biological independent samples; Presented with mean  $\pm$  SD; *P* values calculated by one-way ANOVA with Bonferroni; \*\*:  $p < 0.01$ ; n.s.: not significant).

## Supplementary tables

Supplementary Table 1. ChIP-PCR primer sequences.

| <b>Name</b> | <b>Primer</b> | <b>Sequence (5' --&gt; 3' )</b> |
|-------------|---------------|---------------------------------|
| DSPP-1      | Forward       | ACCTTTGGACATCTTGCTACTT          |
|             | Reverse       | CTCTGTCACCCTGACATTTCTT          |
| DSPP-2      | Forward       | TGAATGTGTGTGTGGGTAAGG           |
|             | Reverse       | CAAGATGTCCAAAGGTGCATAAAG        |
| DSPP-3      | Forward       | CACCAACCTCCACTGATGAA            |
|             | Reverse       | CACCATTCTCTTGAACCCTAGAT         |
| DSPP-4      | Forward       | GCCTTCCATTGTGGTCAGTA            |
|             | Reverse       | GGCAGATTAAGGGCCTAAGA            |
| DSPP-5      | Forward       | GGGCTCAGAATACGTTCTATCTT         |
|             | Reverse       | CCCTTACCCACACACACATT            |
| Dmp1        | Forward       | ATAACTTGTGATAAGGGGTGG           |
|             | Reverse       | CCATATTCTGTTGGTCAATCAA          |
| Col1a1      | Forward       | ATGAAGGTCCATCCCTCCATTG          |
|             | Reverse       | CTGGTTTTGTGCAACGAAGACG          |
| Msx1        | Forward       | CGCCCAGTTAAAAGTCGAGGGA          |
|             | Reverse       | CCATTGATGACTGCGGGGTTC           |
| Msx2        | Forward       | CCTGTGTGCCTTATAGCTGAC           |
|             | Reverse       | ACAAGGCAAGGTGCAGGCTATA          |
| SFRP        | Forward       | TAGGCAACAAGAGCGAAACTG           |
|             | Reverse       | CGGGGAGCCTGGATCATACTT           |
| Wnt3a       | Forward       | AGTGCCTCTTAACCATCCCAGT          |
|             | Reverse       | AGTGACCAGTCAACTCTCCAGCT         |
| Wnt5a       | Forward       | ATCATACCTTGAGCACGACGAA          |
|             | Reverse       | AAAGGGGTGAGGCAGAAAAGA           |
| Lef1        | Forward       | AAAACCCACTGGAGACCTAG            |

|        |         |                         |
|--------|---------|-------------------------|
|        | Reverse | TGGAGACAAGGGAACACACT    |
| SMURF2 | Forward | CGGGTGAGTGGTGAGAAAGAT   |
|        | Reverse | AGCCAGTGGACTGGGATGTGA   |
| BMP1   | Forward | CCGAGACACCAGAGGCTAATT   |
|        | Reverse | GCAGGAGTGATGGGGTTACAT   |
| BMPR2  | Forward | ACCTGGGAGGTGGAGGTTGCA   |
|        | Reverse | GGCGGAGTCTTGCTCTGTCGA   |
| Shh    | Forward | ACGTGTTGTCTGGAGTAGCCTCT |
|        | Reverse | ATATGCTGCGATGGTAGACAGG  |
| GAPDH  | Forward | CAATCCCCATATCAGTCGT     |
|        | Reverse | TAGTAGCCGGGCCCTACTTT    |

Supplementary Table 2. Quantitative RT-PCR primer sequences.

| Species  | Name   | Primer  | Sequence (5' --> 3' )   |                                   |
|----------|--------|---------|-------------------------|-----------------------------------|
| Human    | Alx3   | Forward | GCTCAGGGTAAAGCCCAAGGAG  |                                   |
|          |        | Reverse | TGGGAGCGACTGGGAATGGAAA  |                                   |
|          | DSPP   | Forward | GTGGGGTTGCTACACATGAAAC  |                                   |
|          |        | Reverse | CCATCACCAGAGCCTGTATCTTC |                                   |
|          | DMP1   | Forward | TGTGAACTACGGAGGGTAGAGG  |                                   |
|          |        | Reverse | ACTGGGAGAGCACAGGATAATCC |                                   |
|          | Runx2  | Forward | ATGAAATGCTGGAGTGATGTGG  |                                   |
|          |        | Reverse | ATGAAGCCTGGCGATTTAGAGT  |                                   |
|          | Col1a1 | Forward | GAGGGCCAAGACGAAGACATC   |                                   |
|          |        | Reverse | CAGATCACGTCATCGCACAAAC  |                                   |
|          | GAPDH  | Forward | TCAGCAATGCCTCCTGCAC     |                                   |
|          |        | Reverse | TCTGGGTGGCAGTGATGGC     |                                   |
|          | Mouse  | Alx3    | Forward                 | AAGCCCCTCTCCTGCCCCCCACCCCCGCG     |
|          |        |         | Reverse                 | TTTTATTTTGATCGATGTCCAATATGGTTTTCA |
| Laminin1 |        | Forward | ACTATGCCGTCAGCGATACAG   |                                   |
|          |        | Reverse | GGCACCAGCTTTGAATAATACGA |                                   |
| Col IV   |        | Forward | GGCCCCAAAGGTGTTGATG     |                                   |
|          |        | Reverse | CAGGTAAGCCGTAAATCCAGG   |                                   |
| DSPP     |        | Forward | AACTCTGTGGCTGTGCCTCT    |                                   |
|          |        | Reverse | TATTGACTCGGAGCCATTCC    |                                   |
| DMP1     |        | Forward | CAGTGAGGATGAGGCAGACA    |                                   |
|          |        | Reverse | TCGATCGCTCCTGGTACTCT    |                                   |
| Col1a1   |        | Forward | CCTGACGCATGGCCAAGAAGA   |                                   |
|          |        | Reverse | GCATTGCACGTCATCGCAC     |                                   |
| Msx1     |        | Forward | AAGTTCCGCCAGAAGCAGTA    |                                   |
|          |        | Reverse | TCAGGTGGTACATGCTGTAG    |                                   |
| BMP4     |        | Forward | CTGTTGTGTCCCCACTGAACT   |                                   |



|       |         |                         |
|-------|---------|-------------------------|
|       | Reverse | ACCCCTCTACCACCATCTCC    |
| Pax9  | Forward | GCATCCGCTCCATCACCGACC   |
|       | Reverse | TGGACGCTCCCATCAGAGTGC   |
| Shh   | Forward | CTGGCCAGATGTTTTCTGGT    |
|       | Reverse | TAAAGGGGTCAGCTTTTTGG    |
| Wnt3a | Forward | TTTGGAGGAATGGTCTCTCG    |
|       | Reverse | GACCCCTCCAAGTAGGAACC    |
| Wnt5a | Forward | CTGGCAGGACTTTCTCAAGG    |
|       | Reverse | CTCTAGCGTCCACGAACTCC    |
| GAPDH | Forward | AGGTCGGTGTGAACGGATTTG   |
|       | Reverse | TGTAGACCATGTAGTTGAGGTCA |
